# Supplementary material
Source: publisher figshare collection journal article supplement (https://acs.figshare.com/ndownloader/files/4498759)
Supplement: Supplementary file 1 [file 4498759]

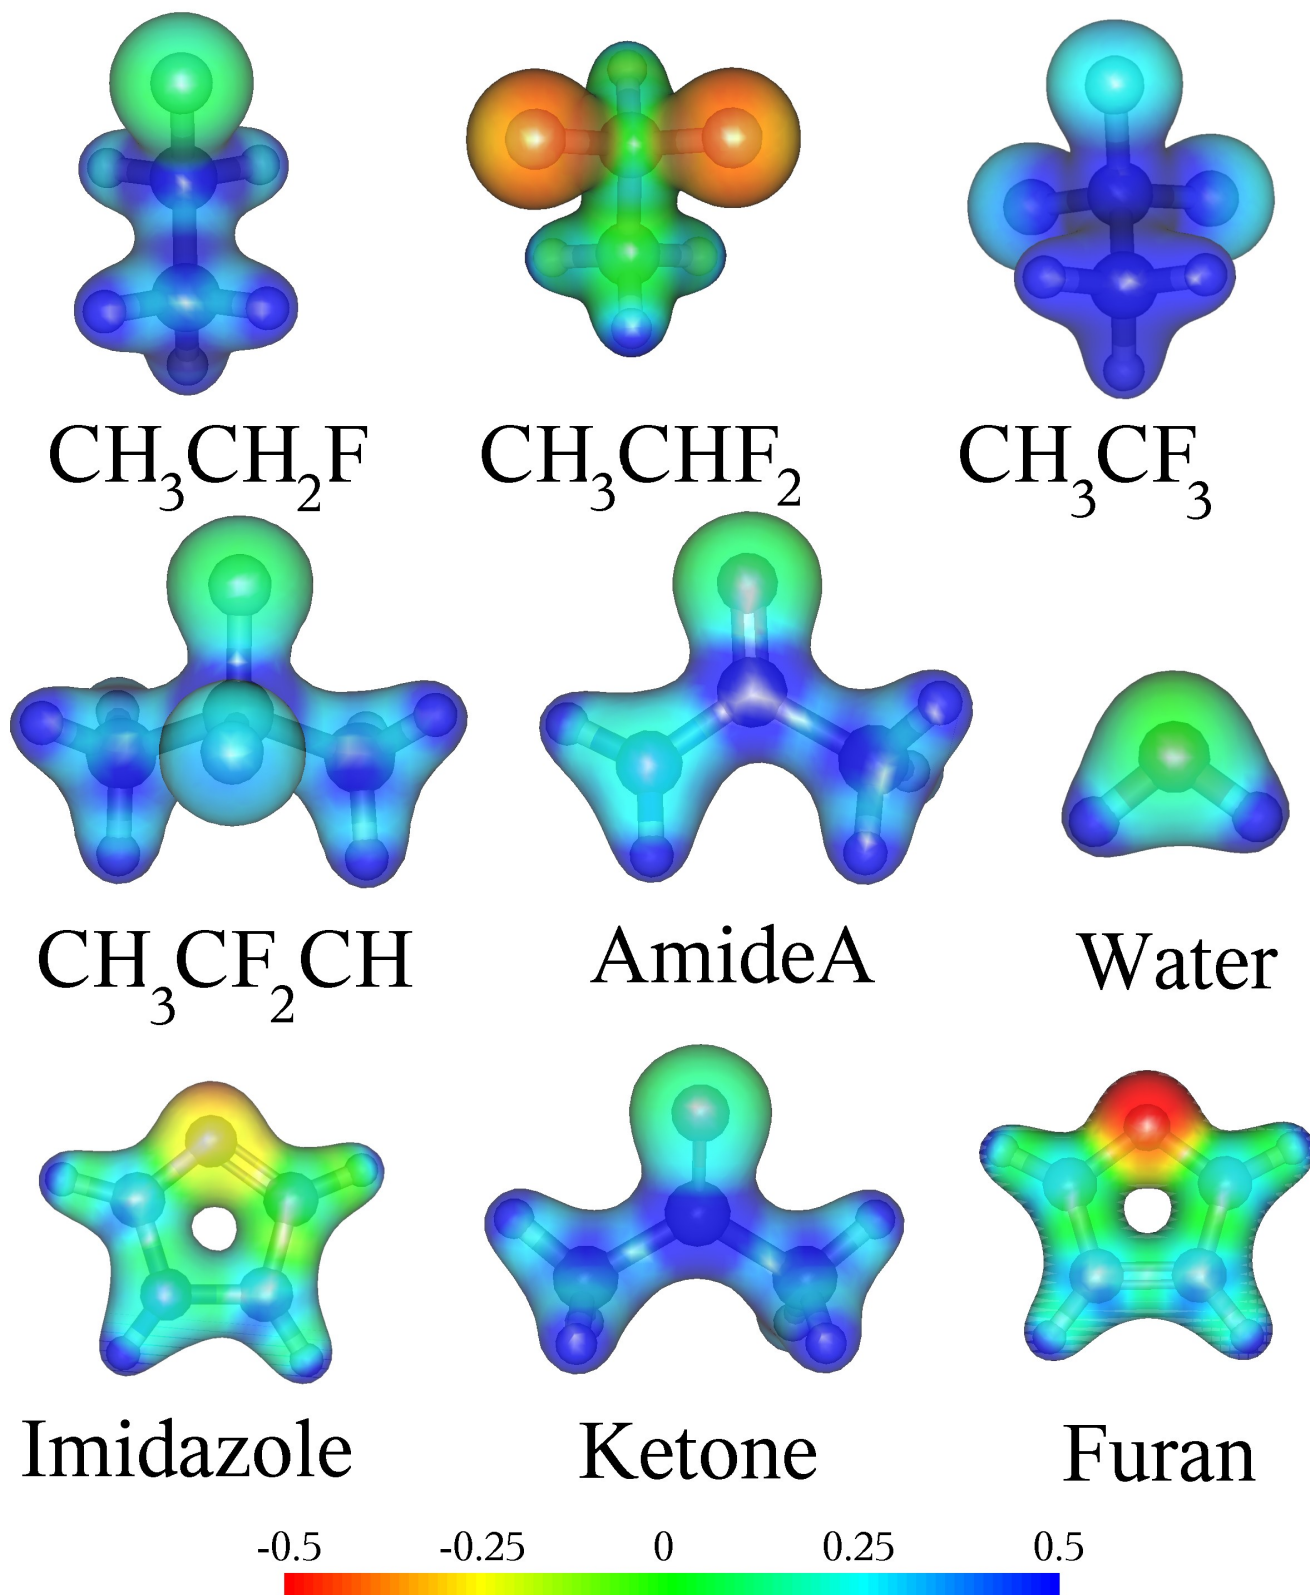

Supplementary File 7. Electrostatic potential of H-bond acceptors. All isovalues are represented within the same scale of potential. B3LYP (6-311G\*\*++) optimization.
